# Supplementary material for: Expression of Cell Cycle Markers and Proliferation Factors during Human Eye Embryogenesis and Tumorigenesis
Source: MDPI journal article supplement (doi:10.3390/ijms23169421), 2022-08-20
Supplement: s1 [file s1]

Supplementary table S1. Expression of p19 - comparison between structures in normal human eye (NHE), the eye section of an 8-week human embryo (8-w.HE) and retinoblastoma (Rb). Tukey's multiple comparisons test P-values.

|        |     | NHE |         | 8-w.HE  |         | rRb     |         |         |
|--------|-----|-----|---------|---------|---------|---------|---------|---------|
|        |     | R   | CHR     | R       | CHR     | R       | CHR     | T       |
| NHE    | R   |     | <0.0001 | <0.0001 |         | <0.0001 |         | <0.0001 |
|        | CHR |     |         |         | <0.0001 |         | <0.0001 |         |
| 8-w.HE | R   |     |         |         | <0.0001 | <0.0001 |         | <0.0001 |
|        | CHR |     |         |         |         |         | <0.0001 |         |
| rRb    | R   |     |         |         |         |         | <0.0001 | <0.0001 |
|        | CHR |     |         |         |         |         |         | <0.0001 |
|        | T   |     |         |         |         |         |         |         |

Supplementary table S2. Expression of p19 - comparison between structures in normal human eye (NHE), epithelioid melanoma (EM), spindle melanoma (SM), and myxoid melanoma (MM). Tukey's multiple comparisons test P-values.

|     |     | EM      |         |         | SM      |         |         | MM      |         |         |
|-----|-----|---------|---------|---------|---------|---------|---------|---------|---------|---------|
|     |     | R       | CHR     | T       | R       | CHR     | T       | R       | CHR     | T       |
| NHE | R   | <0.0001 |         |         | <0.0001 |         |         | <0.0001 |         |         |
|     | CHR |         | <0.0001 | <0.0001 |         | <0.0001 | <0.0001 |         | <0.0001 | <0.0001 |
| EM  | R   |         | <0.0001 | <0.0001 | <0.0001 |         |         | <0.0001 |         |         |
|     | CHR |         |         | <0.0001 |         | <0.0001 |         |         | <0.0001 |         |
|     | T   |         |         |         |         |         | <0.0001 |         |         | <0.0001 |
| SM  | R   |         |         |         |         | <0.0001 | <0.0001 | <0.0001 |         |         |
|     | CHR |         |         |         |         |         | <0.0001 |         | 0.0002  |         |
|     | T   |         |         |         |         |         |         |         |         | <0.0001 |
| MM  | R   |         |         |         |         |         |         |         | <0.0001 | <0.0001 |
|     | CHR |         |         |         |         |         |         |         |         | <0.0001 |
|     | T   |         |         |         |         |         |         |         |         |         |

Supplementary table S3. Expression of Ki67 - comparison between structures in normal human eye (NHE), the eye section of an 8-week human embryo (8-w.HE) and retinoblastoma (Rb). Tukey's multiple comparisons test P-values.

|        |     | NHE |     | 8-w.HE  |         | rRb     |         |         |
|--------|-----|-----|-----|---------|---------|---------|---------|---------|
|        |     | R   | CHR | R       | CHR     | R       | CHR     | T       |
| NHE    | R   |     | ns  | <0.0001 |         | ns      |         | <0.0001 |
|        | CHR |     |     |         | <0.0001 |         | ns      |         |
| 8-w.HE | R   |     |     |         | <0.0001 | <0.0001 |         | <0.0001 |
|        | CHR |     |     |         |         |         | <0.0001 |         |
| rRb    | R   |     |     |         |         |         | ns      | <0.0001 |
|        | CHR |     |     |         |         |         |         | <0.0001 |
|        | T   |     |     |         |         |         |         |         |

Supplementary table S4. Expression of Ki67 - comparison between structures in normal human eye (NHE), epithelioid melanoma (EM), spindle melanoma (SM), and myxoid melanoma (MM). Tukey's multiple comparisons test P-values.

|     |     | EM |     |         | SM      |         |         | MM      |         |         |
|-----|-----|----|-----|---------|---------|---------|---------|---------|---------|---------|
|     |     | R  | CHR | T       | R       | CHR     | T       | R       | CHR     | T       |
| NHE | R   | ns |     |         | ns      |         |         | ns      |         |         |
|     | CHR |    | ns  | <0.0001 |         | ns      | <0.0001 |         | ns      | <0.0001 |
| EM  | R   |    | ns  | <0.0001 | <0.0001 |         |         | <0.0001 |         |         |
|     | CHR |    |     | <0.0001 |         | <0.0001 |         |         | <0.0001 |         |
|     | T   |    |     |         |         |         | <0.0001 |         |         | <0.0001 |
| SM  | R   |    |     |         |         | ns      | <0.0001 | <0.0001 |         |         |
|     | CHR |    |     |         |         |         | <0.0001 |         | ns      |         |
|     | T   |    |     |         |         |         |         |         |         | <0.0001 |
| MM  | R   |    |     |         |         |         |         |         | ns      | <0.0001 |
|     | CHR |    |     |         |         |         |         |         |         | <0.0001 |
|     | T   |    |     |         |         |         |         |         |         |         |

Supplementary table S5. Expression of MSX1 - comparison between structures in normal human eye (NHE), the eye section of an 8-week human embryo (8-w.HE) and retinoblastoma (Rb). Tukey's multiple comparisons test P-values.

|        |     | NHE |     | 8-w.HE  |         | rRb     |         |         |
|--------|-----|-----|-----|---------|---------|---------|---------|---------|
|        |     | R   | CHR | R       | CHR     | R       | CHR     | T       |
| NHE    | R   |     | ns  | <0.0001 |         | <0.0001 |         | <0.0001 |
|        | CHR |     |     |         | <0.0001 |         | <0.0001 |         |
| 8-w.HE | R   |     |     |         | <0.0001 | <0.0001 |         | <0.0001 |
|        | CHR |     |     |         |         |         | <0.0001 |         |
| rRb    | R   |     |     |         |         |         | <0.0001 | <0.0001 |
|        | CHR |     |     |         |         |         |         | <0.0001 |
|        | T   |     |     |         |         |         |         |         |

Supplementary table S6. Expression of MSX1 - comparison between structures in normal human eye (NHE), epithelioid melanoma (EM), spindle melanoma (SM), and myxoid melanoma (MM). Tukey's multiple comparisons test P-values.

|     |     | EM      |         |         | SM      |         |         | MM      |         |         |
|-----|-----|---------|---------|---------|---------|---------|---------|---------|---------|---------|
|     |     | R       | CHR     | T       | R       | CHR     | T       | R       | CHR     | T       |
| NHE | R   | <0.0001 |         |         | <0.0001 |         |         | ns      |         |         |
|     | CHR |         | <0.0001 | ns      |         | <0.0001 | <0.0001 |         | ns      | <0.0001 |
| EM  | R   |         | <0.0001 | <0.0001 | <0.0001 |         |         | <0.0001 |         |         |
|     | CHR |         |         | <0.0001 |         | <0.0001 |         |         | <0.0001 |         |
|     | T   |         |         |         |         |         | <0.0001 |         |         | <0.0001 |

|    |     |  |  |  |  |        |         |         |         |         |
|----|-----|--|--|--|--|--------|---------|---------|---------|---------|
| SM | R   |  |  |  |  | 0.0003 | <0.0001 | <0.0001 |         |         |
|    | CHR |  |  |  |  |        | <0.0001 |         | <0.0001 |         |
|    | T   |  |  |  |  |        |         |         |         | <0.0001 |
| MM | R   |  |  |  |  |        |         |         | ns      | <0.0001 |
|    | CHR |  |  |  |  |        |         |         |         | <0.0001 |
|    | T   |  |  |  |  |        |         |         |         |         |

Supplementary table S7. Expression of MSX2 - comparison between structures in normal human eye (NHE), the eye section of an 8-week human embryo (8-w.HE) and retinoblastoma (Rb). Tukey's multiple comparisons test P-values.

|        |     | NHE |     | 8-w.HE  |         | rRb     |         |         |
|--------|-----|-----|-----|---------|---------|---------|---------|---------|
|        |     | R   | CHR | R       | CHR     | R       | CHR     | T       |
| NHE    | R   |     | ns  | <0.0001 |         | <0.0001 |         | <0.0001 |
|        | CHR |     |     |         | <0.0001 |         | <0.0001 |         |
| 8-w.HE | R   |     |     |         | <0.0001 | <0.0001 |         | <0.0001 |
|        | CHR |     |     |         |         |         | <0.0001 |         |
| rRb    | R   |     |     |         |         |         | <0.0001 | <0.0001 |
|        | CHR |     |     |         |         |         |         | 0.0006  |
|        | T   |     |     |         |         |         |         |         |

Supplementary table S8. Expression of MSX2 - comparison between structures in normal human eye (NHE), epithelioid melanoma (EM), spindle melanoma (SM), and myxoid melanoma (MM). Tukey's multiple comparisons test P-values.

|     |     | EM      |         |         | SM      |         |    | MM      |         |         |
|-----|-----|---------|---------|---------|---------|---------|----|---------|---------|---------|
|     |     | R       | CHR     | T       | R       | CHR     | T  | R       | CHR     | T       |
| NHE | R   | <0.0001 |         |         | ns      |         |    | ns      |         |         |
|     | CHR |         | <0.0001 | ns      |         | ns      | ns |         | ns      | <0.0001 |
| EM  | R   |         | <0.0001 | <0.0001 | <0.0001 |         |    | <0.0001 |         |         |
|     | CHR |         |         | <0.0001 |         | <0.0001 |    |         | <0.0001 |         |
|     | T   |         |         |         |         |         | ns |         |         | <0.0001 |
| SM  | R   |         |         |         |         | ns      | ns | ns      |         |         |
|     | CHR |         |         |         |         |         | ns |         | ns      |         |
|     | T   |         |         |         |         |         |    |         |         | <0.0001 |
| MM  | R   |         |         |         |         |         |    |         | ns      | <0.0001 |
|     | CHR |         |         |         |         |         |    |         |         | <0.0001 |
|     | T   |         |         |         |         |         |    |         |         |         |

Supplementary table S9. Expression of PDL1 - comparison between structures in normal human eye (NHE), the eye section of an 8-week human embryo (8-w.HE) and retinoblastoma (Rb). Tukey's multiple comparisons test P-values.

|     |   | NHE |     | 8-w.HE  |     | rRb     |     |         |
|-----|---|-----|-----|---------|-----|---------|-----|---------|
|     |   | R   | CHR | R       | CHR | R       | CHR | T       |
| NHE | R |     | ns  | <0.0001 |     | <0.0001 |     | <0.0001 |

|        |     |  |  |  |         |       |         |         |
|--------|-----|--|--|--|---------|-------|---------|---------|
|        | CHR |  |  |  | 0.0040  |       | <0.0001 |         |
| 8-w.HE | R   |  |  |  | <0.0001 | 0.001 |         | <0.0001 |
|        | CHR |  |  |  |         |       | <0.0001 |         |
| rRb    | R   |  |  |  |         |       | <0.0001 | <0.0001 |
|        | CHR |  |  |  |         |       |         | <0.0001 |
|        | T   |  |  |  |         |       |         |         |

Supplementary table S10. Expression of PDL1 - comparison between structures in normal human eye (NHE), epithelioid melanoma (EM), spindle melanoma (SM), and myxoid melanoma (MM). Tukey's multiple comparisons test P-values.

|     |     | EM      |         |         | SM      |         |         | MM      |         |         |
|-----|-----|---------|---------|---------|---------|---------|---------|---------|---------|---------|
|     |     | R       | CHR     | T       | R       | CHR     | T       | R       | CHR     | T       |
| NHE | R   | <0.0001 |         |         | <0.0001 |         |         | <0.0001 |         |         |
|     | CHR |         | ns      | <0.0001 |         | <0.0001 | <0.0001 |         | <0.0001 | <0.0001 |
| EM  | R   |         | <0.0001 | <0.0001 | <0.0001 |         |         | <0.0001 |         |         |
|     | CHR |         |         | <0.0001 |         | <0.0001 |         |         | <0.0001 |         |
|     | T   |         |         |         |         |         | <0.0001 |         |         | <0.0001 |
| SM  | R   |         |         |         |         | <0.0001 | <0.0001 | <0.0001 |         |         |
|     | CHR |         |         |         |         |         | <0.0001 |         | <0.0001 |         |
|     | T   |         |         |         |         |         |         |         |         | <0.0001 |
| MM  | R   |         |         |         |         |         |         |         | <0.0001 | <0.0001 |
|     | CHR |         |         |         |         |         |         |         |         | <0.0001 |
|     | T   |         |         |         |         |         |         |         |         |         |

Supplementary table S11. Expression of pRB - comparison between structures in normal human eye (NHE), the eye section of an 8-week human embryo (8-w.HE) and retinoblastoma (Rb). Tukey's multiple comparisons test P-values.

|        |     | NHE |     | 8-w.HE  |         | rRb     |         |         |
|--------|-----|-----|-----|---------|---------|---------|---------|---------|
|        |     | R   | CHR | R       | CHR     | R       | CHR     | T       |
| NHE    | R   |     | ns  | <0.0001 |         | <0.0001 |         | <0.0001 |
|        | CHR |     |     |         | <0.0001 |         | ns      |         |
| 8-w.HE | R   |     |     |         | <0.0001 | <0.0001 |         | <0.0001 |
|        | CHR |     |     |         |         |         | <0.0001 |         |
| rRb    | R   |     |     |         |         |         | <0.0001 | <0.0001 |
|        | CHR |     |     |         |         |         |         | <0.0001 |
|        | T   |     |     |         |         |         |         |         |

Supplementary table S12. Expression of pRB - comparison between structures in normal human eye (NHE), epithelioid melanoma (EM), spindle melanoma (SM), and myxoid melanoma (MM). Tukey's multiple comparisons test P-values.

|  | EM | SM | MM |
|--|----|----|----|
|--|----|----|----|

|     | R   | CHR     | T       | R       | CHR     | T       | R       | CHR     | T       |
|-----|-----|---------|---------|---------|---------|---------|---------|---------|---------|
| NHE | R   | <0.0001 |         | <0.0001 |         |         | <0.0001 |         |         |
|     | CHR |         | ns      | <0.0001 | <0.0001 | <0.0001 | <0.0001 | <0.0001 | <0.0001 |
| EM  | R   |         | <0.0001 | <0.0001 | <0.0001 |         | <0.0001 |         |         |
|     | CHR |         |         | <0.0001 |         | <0.0001 |         | <0.0001 |         |
|     | T   |         |         |         |         | ns      |         |         | <0.0001 |
| SM  | R   |         |         |         | ns      | <0.0001 | <0.0001 |         |         |
|     | CHR |         |         |         |         | <0.0001 |         | ns      |         |
|     | T   |         |         |         |         |         |         |         | <0.0001 |
| MM  | R   |         |         |         |         |         |         | <0.0001 | <0.0001 |
|     | CHR |         |         |         |         |         |         |         | <0.0001 |
|     | T   |         |         |         |         |         |         |         |         |

Supplementary table S13. Expression of CYCA2 - comparison between structures in normal human eye (NHE), the eye section of an 8-week human embryo (8-w.HE) and retinoblastoma (Rb). Tukey's multiple comparisons test P-values.

|        |     | NHE |     | 8-w.HE  |         | rRb     |         |         |
|--------|-----|-----|-----|---------|---------|---------|---------|---------|
|        |     | R   | CHR | R       | CHR     | R       | CHR     | T       |
| NHE    | R   |     | ns  | <0.0001 |         | <0.0001 |         | <0.0001 |
|        | CHR |     |     |         | <0.0001 |         | ns      |         |
| 8-w.HE | R   |     |     |         | <0.0001 | <0.0001 |         | <0.0001 |
|        | CHR |     |     |         |         |         | <0.0001 |         |
| rRb    | R   |     |     |         |         |         | <0.0001 | <0.0001 |
|        | CHR |     |     |         |         |         |         | <0.0001 |
|        | T   |     |     |         |         |         |         |         |

Supplementary table S14. Expression of CYCA2 - comparison between structures in normal human eye (NHE), epithelioid melanoma (EM), spindle melanoma (SM), and myxoid melanoma (MM). Tukey's multiple comparisons test P-values.

[illegible]
